# Supplementary material for: Controlling the nanoparticle size and shape of a Pt/TiO 2 catalyst for enhanced hydrogenation of furfural to furfuryl alcohol
Source: Royal Society of Chemistry journal article supplement (doi:10.1039/d4su00388h), 2024-01-01
Supplement: d4su00388h1.pdf [file d4su00388h1.pdf]

## Supporting information

### Controlling the Nanoparticles Size and Shape of Pt/TiO<sub>2</sub> catalyst for Enhanced Hydrogenation of Furfural to Furfuryl Alcohol

*Heba Alsharif<sup>a,b</sup>, Matthew Conway<sup>a</sup>, David J Morgan<sup>a</sup>, Thomas E. Davies<sup>a</sup>, Stuart H Taylor<sup>a</sup>, Meenakshisundaram Sankar<sup>a\*</sup>*

<sup>a</sup> *Cardiff Catalysis Institute, Translational Research Hub, School of Chemistry, Cardiff University, Cardiff, CF24 4HQ, UK.*

<sup>b</sup> *Chemistry Department, Faculty of Science, Taibah University, 41477, Al-Madinah Al-Munawarah, Saudi Arabia*

*Corresponding author: Dr. M. Sankar, Email: [sankar@cardiff.ac.uk](mailto:sankar@cardiff.ac.uk)*

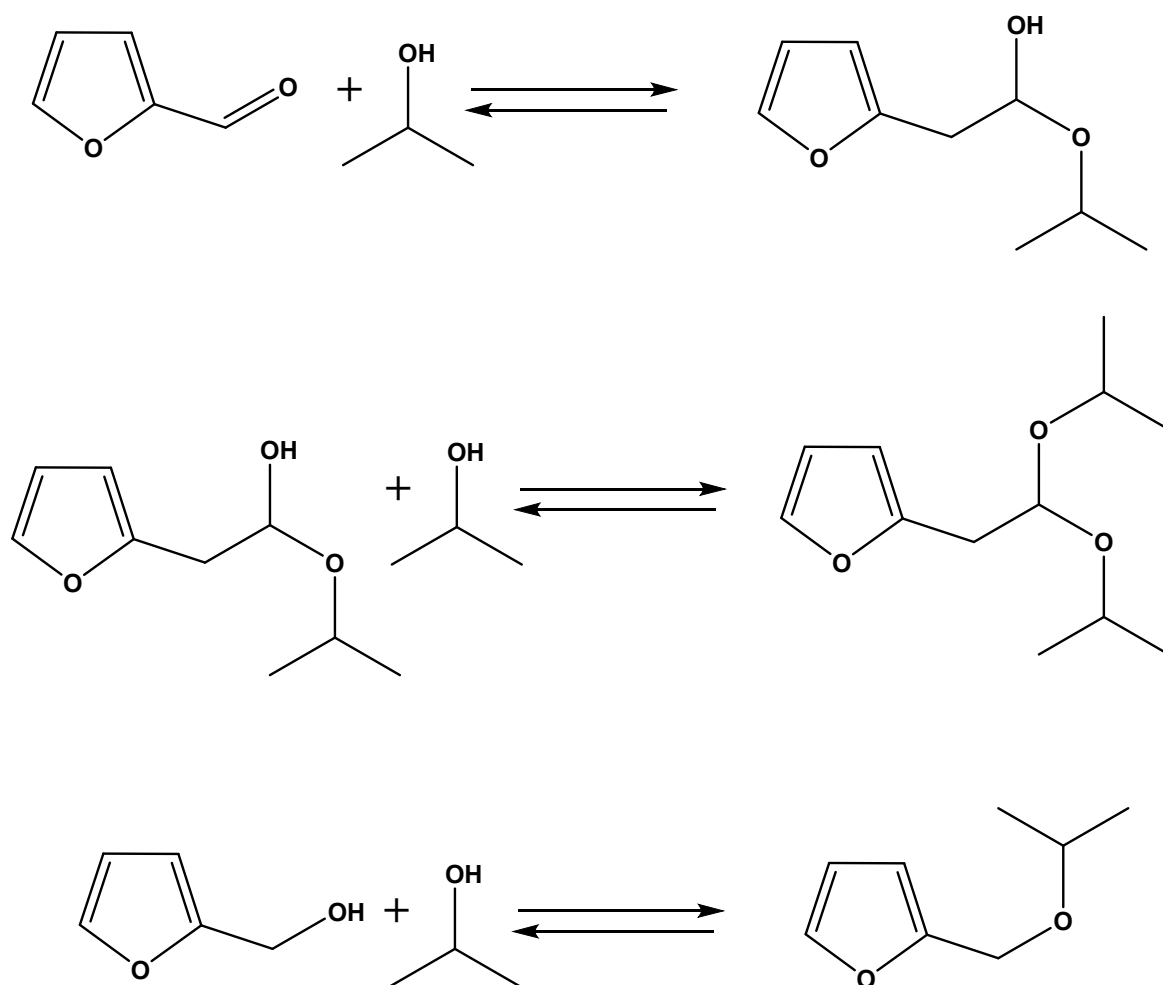

**Scheme S1** Schematic representation of the formation of hemiacetal and subsequent acetalation product from the reaction between furfural and isopropanol (solvent). Acetylation of furfuryl alcohol using isopropanol (last reaction).

**Table S1:** Liquid phase hydrogenation of FF to 2-FFA over 4.2%Pt/TiO<sub>2</sub> catalyst – Effect of heat treatment

| Catalyst                | Heat treatment                         | Conv. (%) | Products Selectivity (%) |      |                 |
|-------------------------|----------------------------------------|-----------|--------------------------|------|-----------------|
|                         |                                        |           | 2-FFA                    | 2-MF | Solvent Product |
| 4.2%Pt/TiO <sub>2</sub> | Calcination                            | 90        | 42                       | 31   | 27              |
|                         | Reduction                              | 25        | 90                       | -    | 10              |
|                         | Calcination + Reduction <sup>[a]</sup> | 99        | 59                       | 9    | 1               |

Reaction conditions: H<sub>2</sub> : 3 bar; Temp : 30 °C; FF: 4.45 mmol; Isopropanol (solvent) : 15 mL; Time : 6h; FF/Pt molar ratio : 207. [a] Rest of the products is a mixture of 4 unknown products.

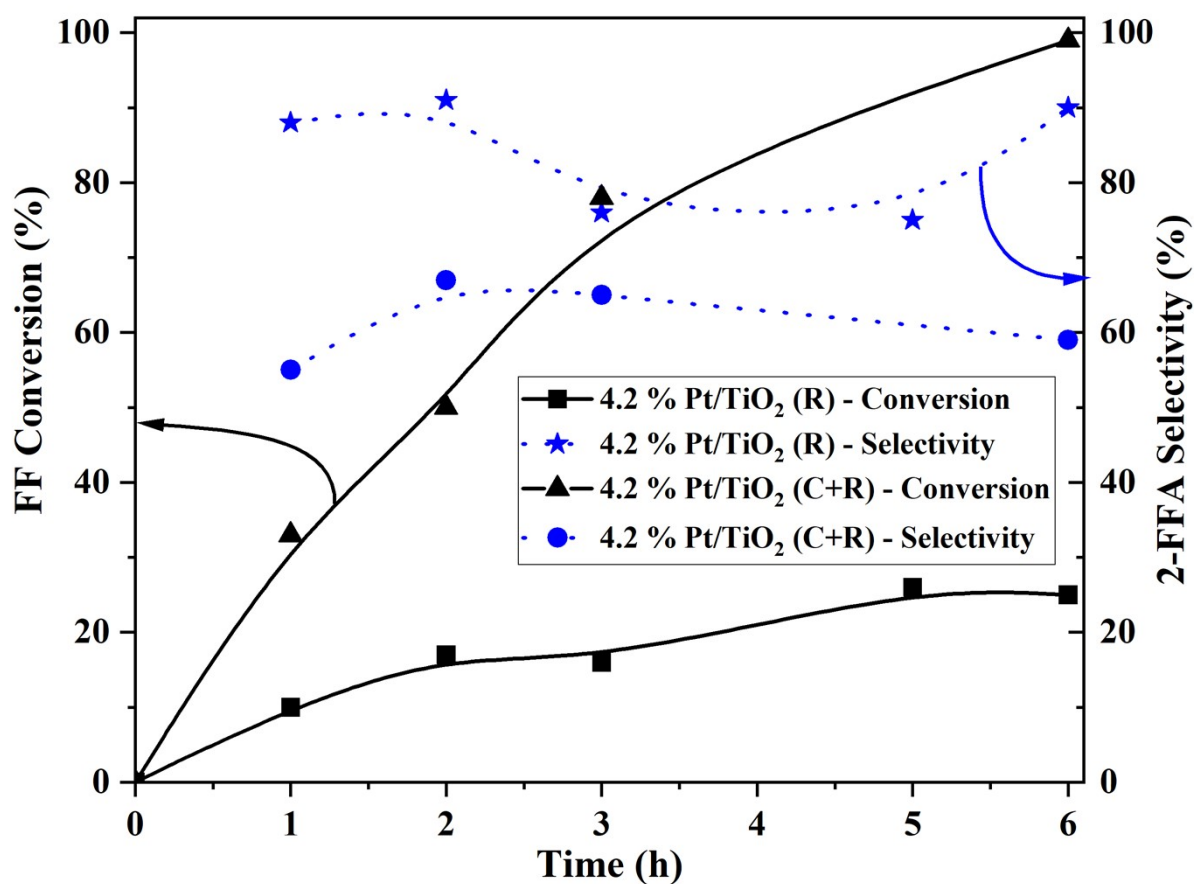

**Figure S1:** Catalytic performance of 4.2%Pt/TiO<sub>2</sub> as a function of time for the hydrogenation of FF to 2-FFA. Effect of catalyst reduction vs calcination + reduction. Reaction conditions: H<sub>2</sub> : 3 bar; Temp : 30 °C; FF: 4.45 mmol; Isopropanol (solvent) : 15 mL; FF/Pt molar ratio : 207.

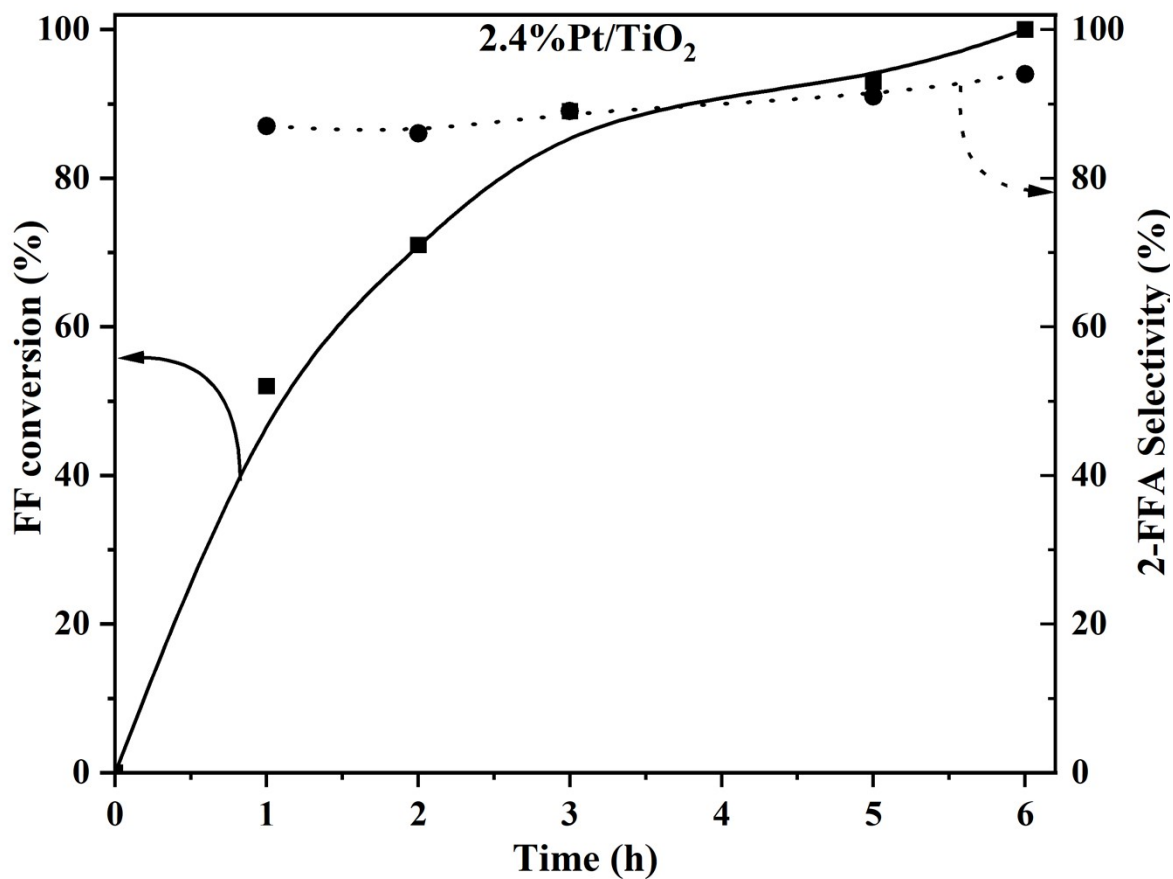

**Figure S2:** : Catalytic performance of 2.4%Pt/TiO<sub>2</sub> (calcination + reduction) as a function of time for the hydrogenation of FF to 2-FFA. Reaction conditions: H<sub>2</sub> : 3 bar; Temp : 30 °C; FF: 4.45 mmol; Isopropanol (solvent) : 15 mL; FF/Pt molar ratio : 207.

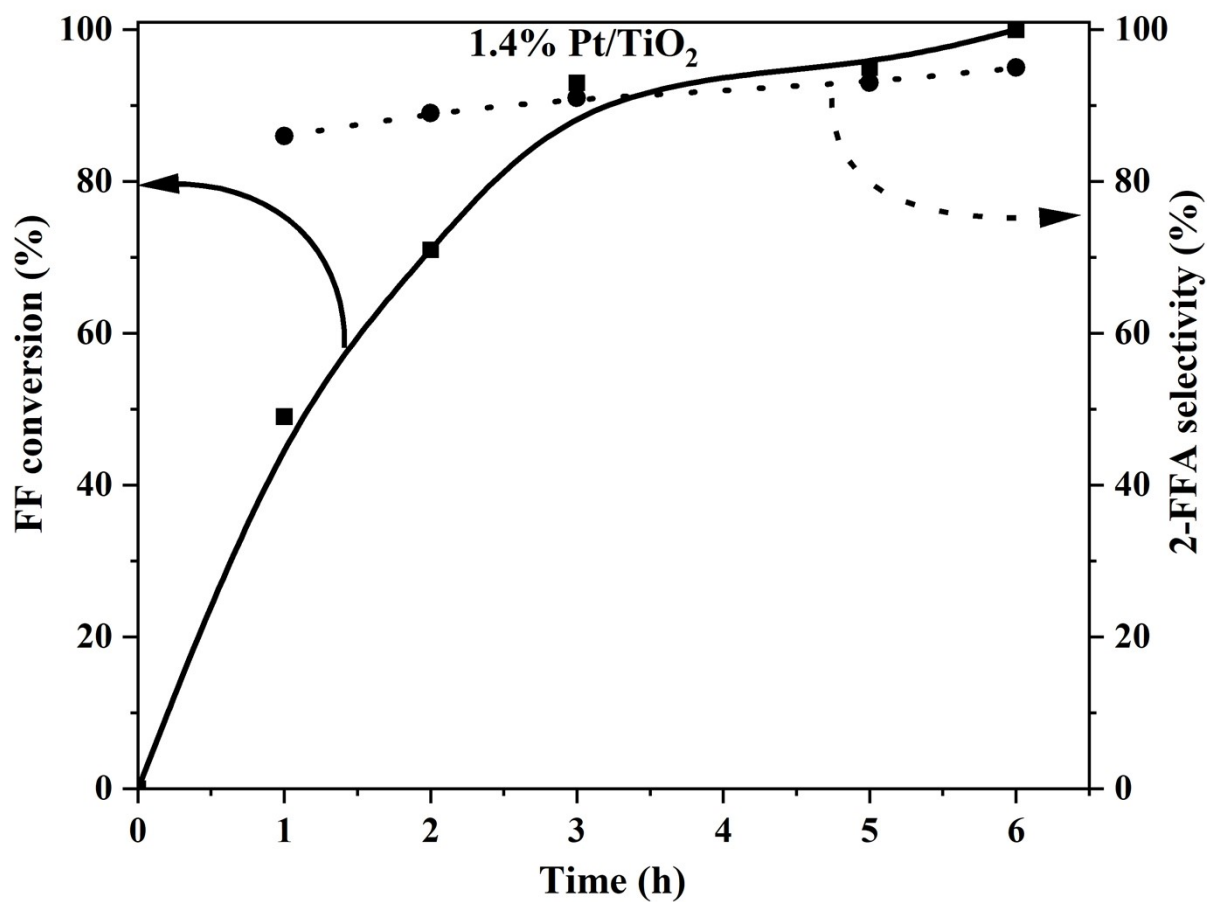

**Figure S3:** Catalytic performance of 1.4%Pt/TiO<sub>2</sub> (calcination + reduction) as a function of time for the hydrogenation of FF to 2-FFA. Reaction conditions: H<sub>2</sub> : 3 bar; Temp : 30 °C; FF: 4.45 mmol; Isopropanol (solvent) : 15 mL; FF/Pt molar ratio : 207.

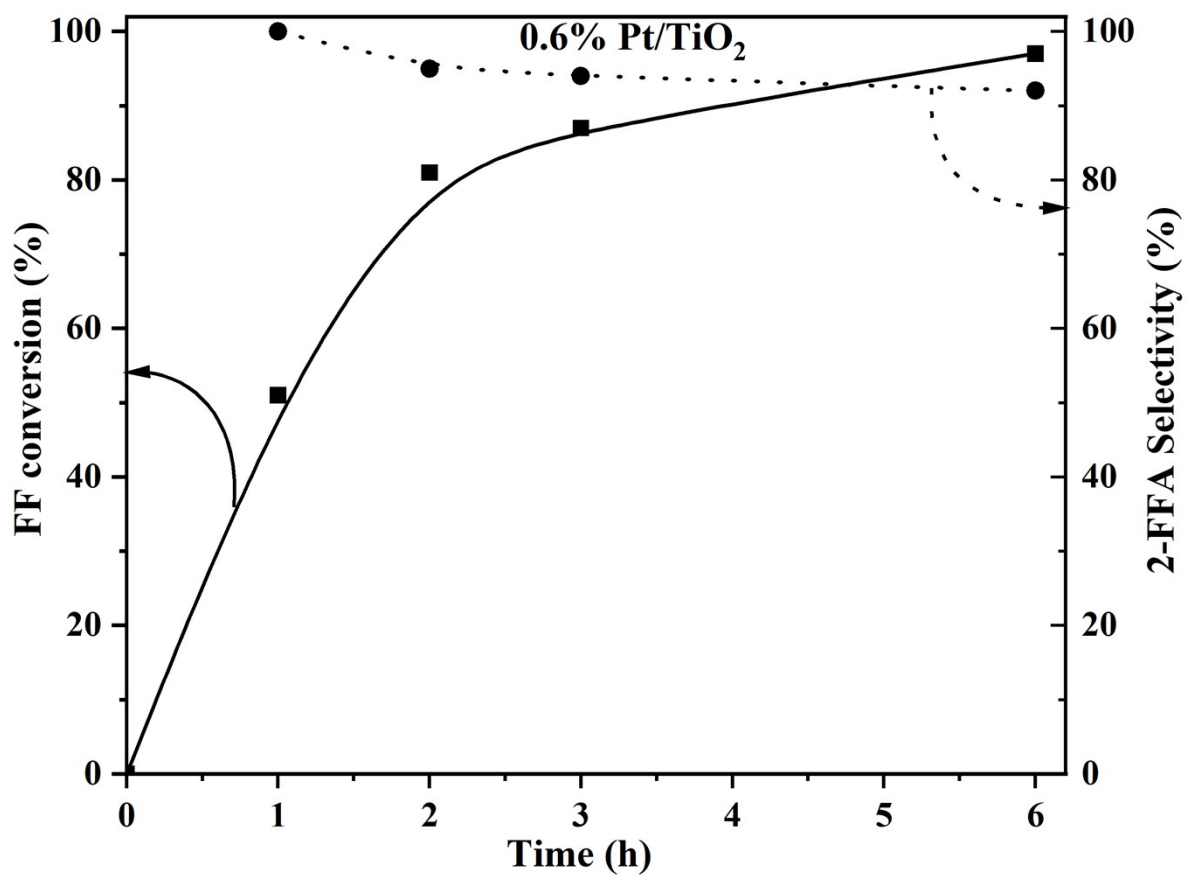

**Figure S4:** Catalytic performance of 0.6%Pt/TiO<sub>2</sub> (calcination + reduction) as a function of time for the hydrogenation of FF to 2-FFA. Reaction conditions: H<sub>2</sub> : 3 bar; Temp : 30 °C; FF: 4.45 mmol; Isopropanol (solvent) : 15 mL; FF/Pt molar ratio : 207.

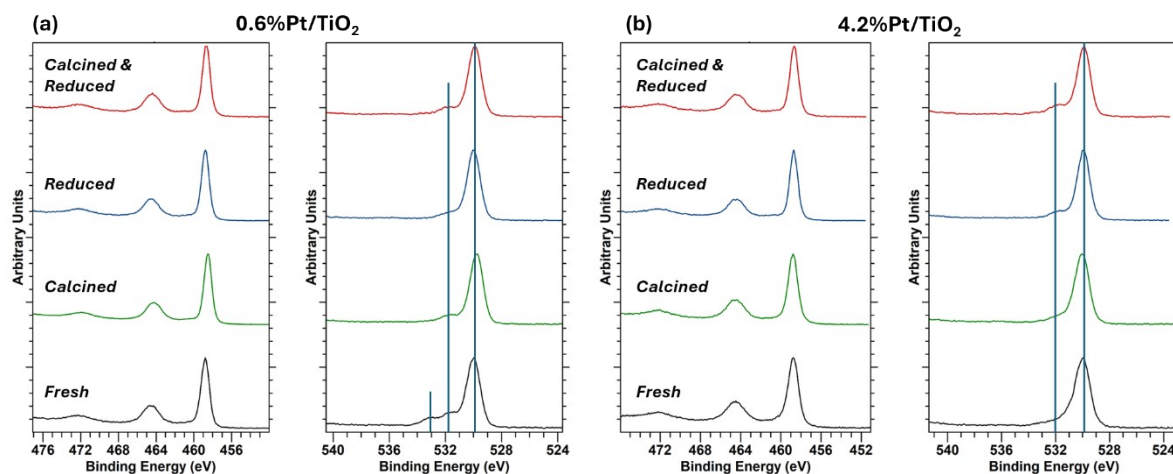

**Figure S5:** *Ti(2p)* and *O(1s)* core-levels spectra for 0.6%Pt/TiO<sub>2</sub> series of catalysts (a) and the 4.2%Pt/TiO<sub>2</sub> series of catalysts (b)

**Table S2:** XPS data for the two Pt/TiO<sub>2</sub> catalysts after different heat treatments.

| Catalyst                | Heat Treatment    | B.E. / eV | Pt species               | Pt Concentration (%) | Total Pt concentration |
|-------------------------|-------------------|-----------|--------------------------|----------------------|------------------------|
| 4.2%Pt/TiO <sub>2</sub> | Dried             | 72.7      | Pt <sup>2+</sup><br>(OH) | 0.92                 | 1.74                   |
|                         |                   | 74.7      | PtCl <sub>x</sub>        | 0.82                 |                        |
|                         | Calcined          | 72.7      | Pt <sup>2+</sup>         | 1.28                 | 1.96                   |
|                         |                   | 74.8      | PtCl <sub>x</sub>        | 0.68                 |                        |
|                         | Reduced           | 70.5      | Pt <sup>0</sup>          | 0.14                 | 0.14                   |
|                         | Calcined+reduced  | 70.9      | Pt <sup>0</sup>          | 1.24                 | 1.24                   |
| 0.6%Pt/TiO <sub>2</sub> | Dried only        | 72.5      | Pt <sup>2+</sup>         | 0.28                 | 0.28                   |
|                         | Reduced only      | 70.7      | Pt <sup>0</sup>          | 0.15                 | 0.15                   |
|                         | Calcined +reduced | 70.6      | Pt <sup>0</sup>          | 0.24                 | 0.24                   |

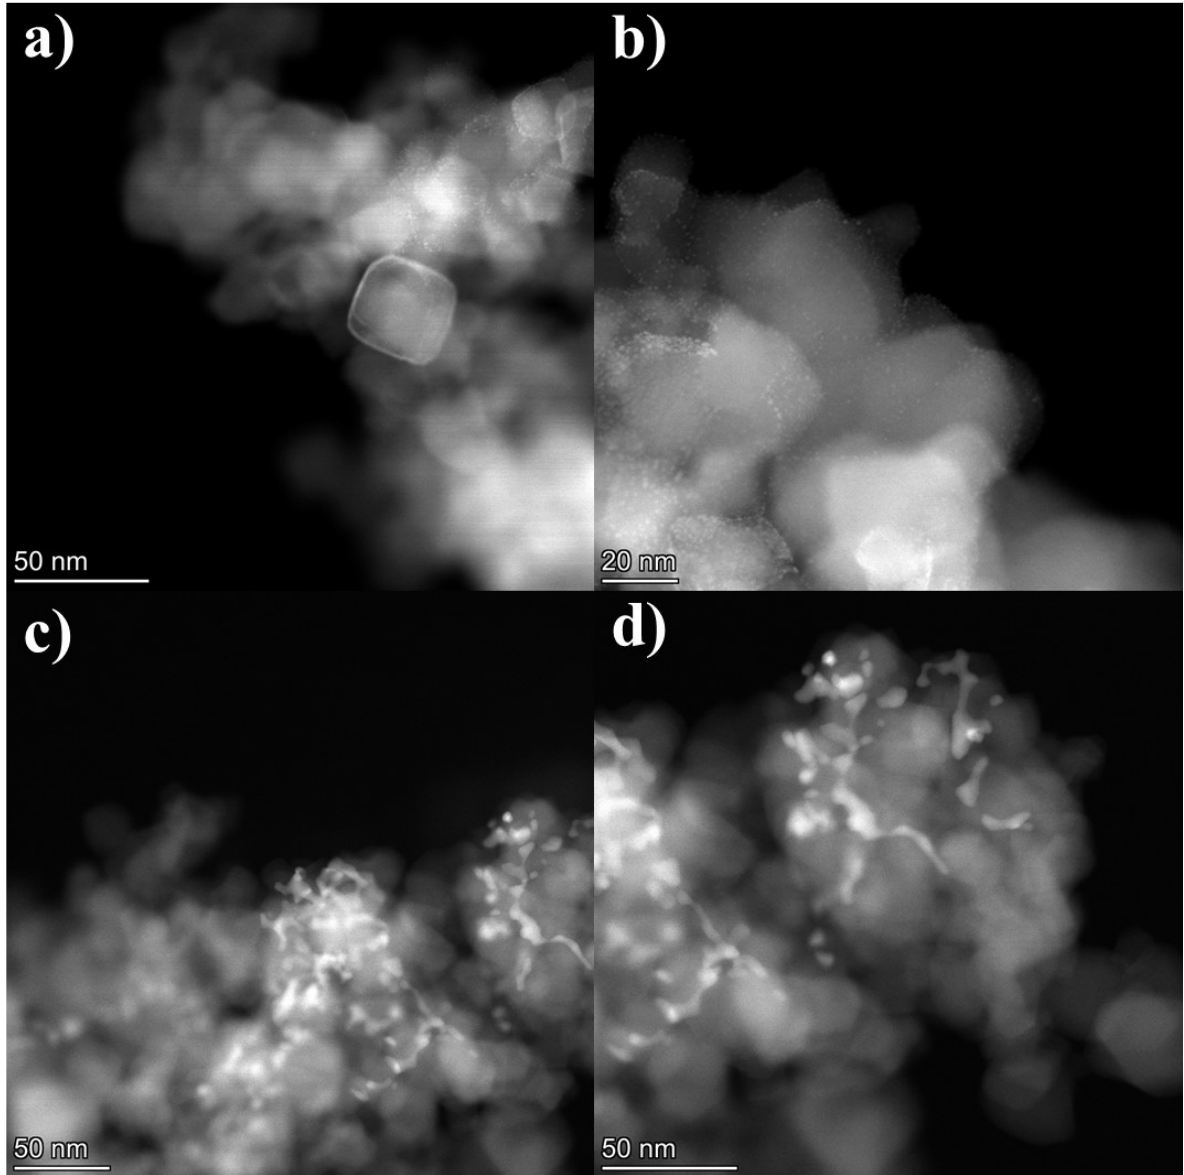



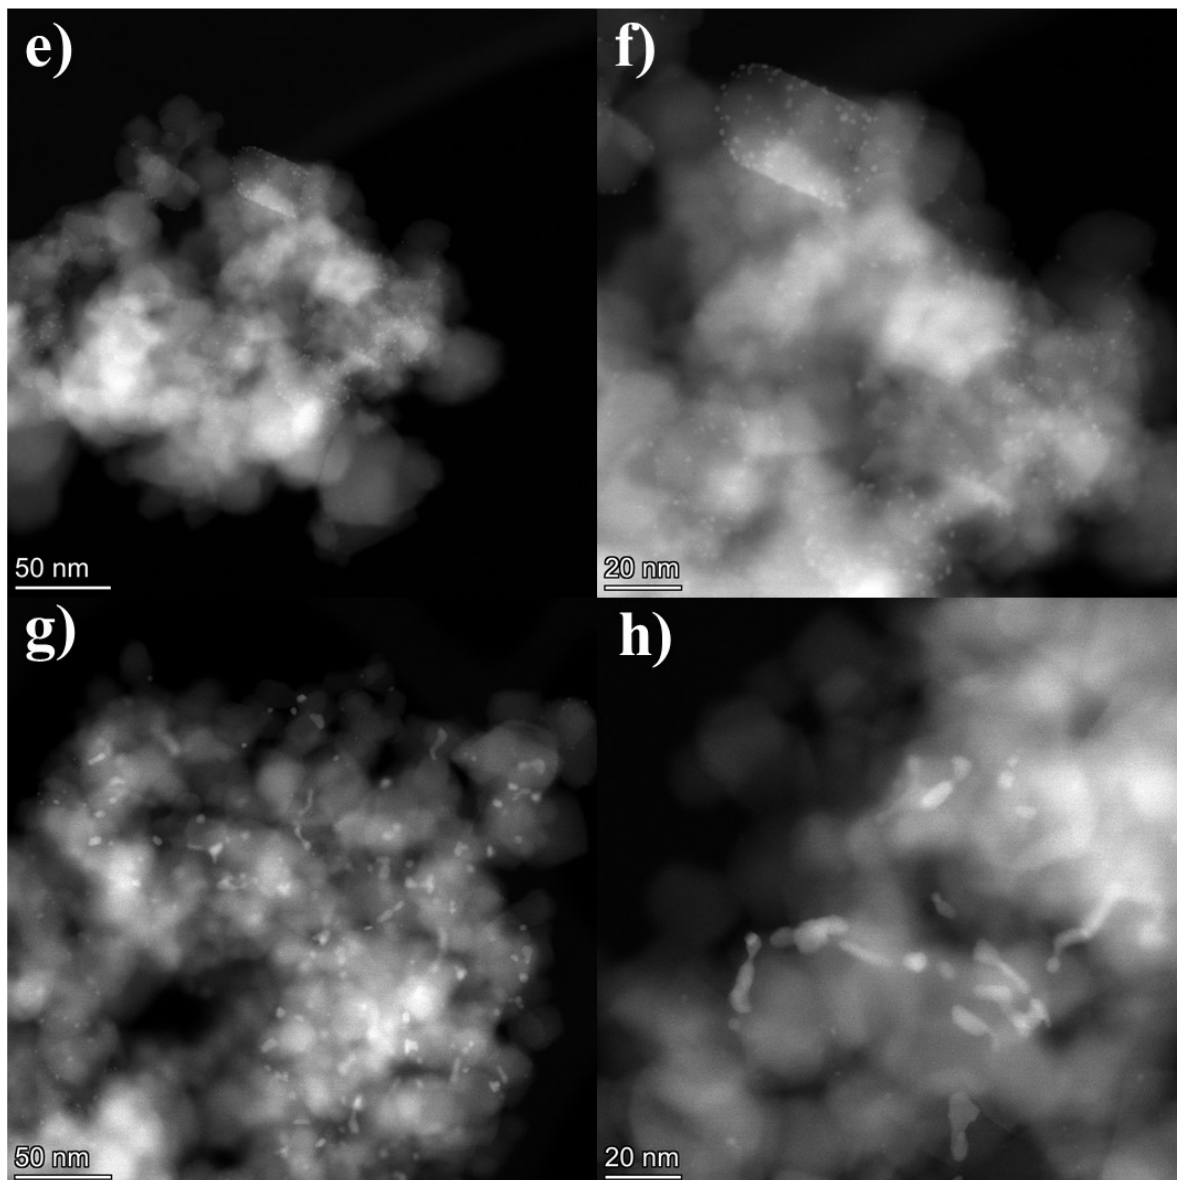

**Figure S6:** Scanning Transmission Electron microscopic images of 4.2%Pt/TiO<sub>2</sub> (C+R) (a & b); 4.2%Pt/TiO<sub>2</sub> (R) (c & d); 0.6%Pt/TiO<sub>2</sub> (C+R) (e & f); 0.6%Pt/TiO<sub>2</sub> (R) (g & h). The lower magnification images highlight the presence of large irregular Pt particles on the reduced only catalysts.



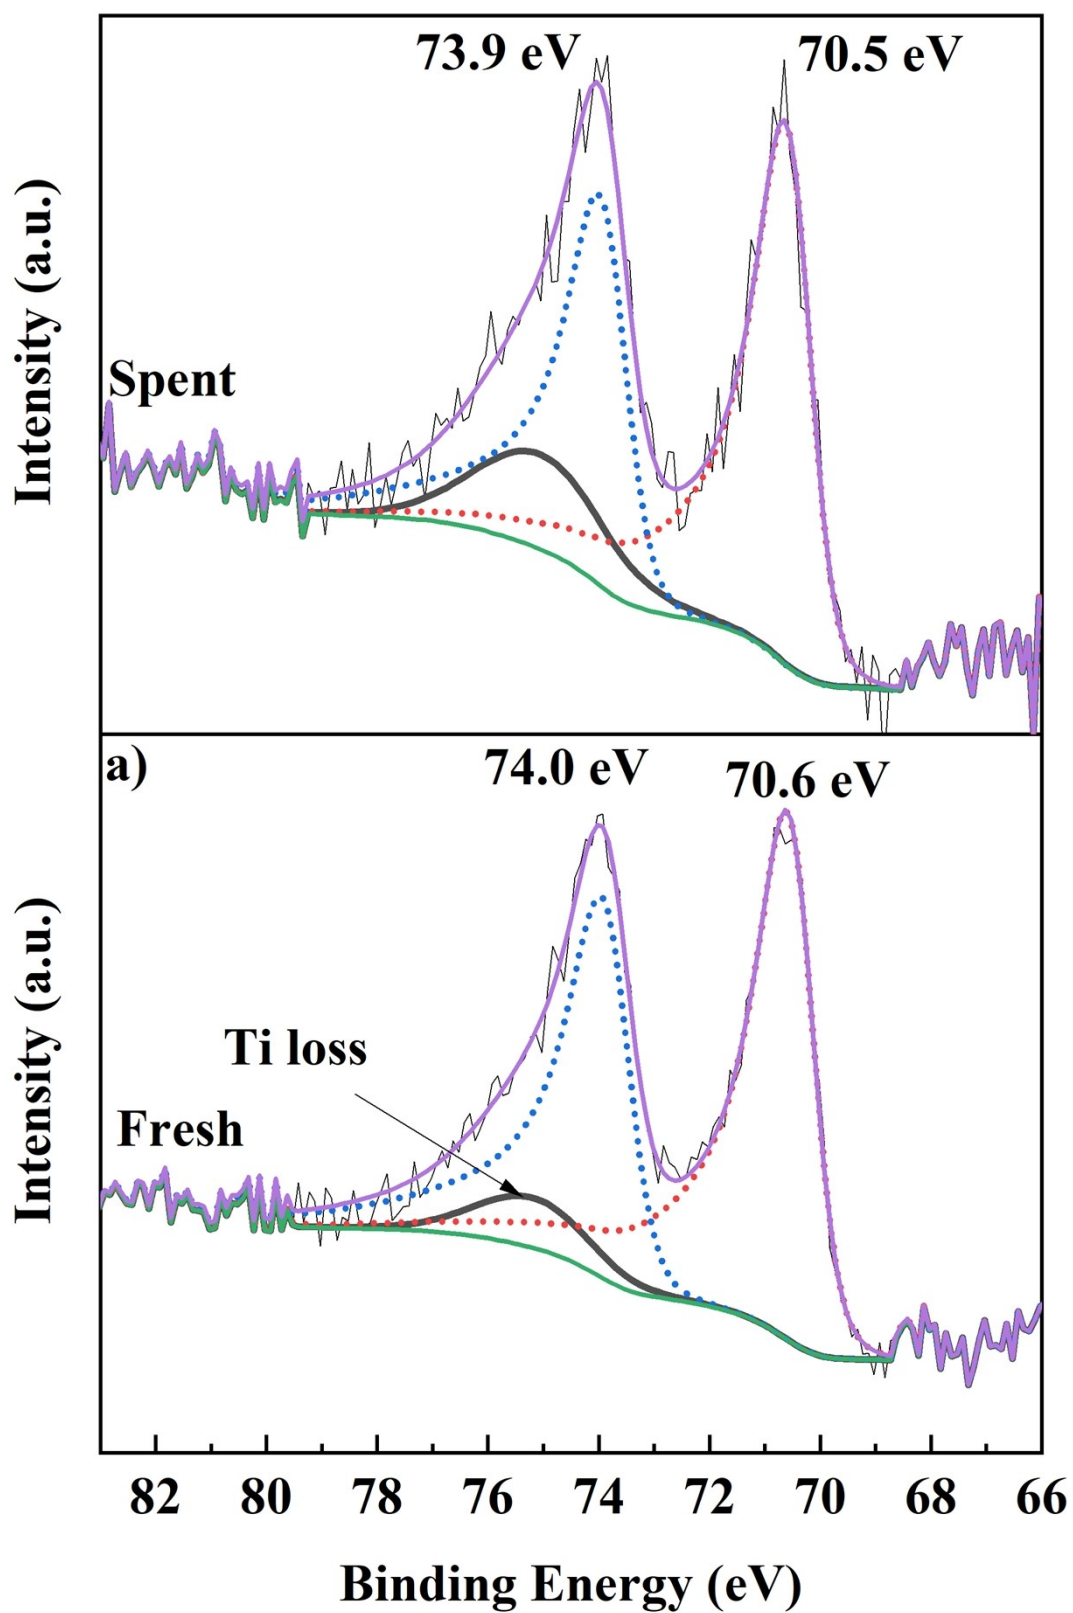

*Figure S7 XPS results of the fresh and spent samples of 0.6% Pt/TiO<sub>2</sub> calc + red*

*Table S3: Quantitative analyses of the metal composition using Inductively Coupled Plasma coupled with Mass Spectra (ICP-MS)*

| <b>Sample</b>                                       | <b>Pt (mg/g)</b> |
|-----------------------------------------------------|------------------|
| 0.6%Pt/TiO <sub>2</sub> - Fresh sample              | 8.77             |
| 0.6%Pt/TiO <sub>2</sub> - Spent sample after 3 runs | 8.92             |

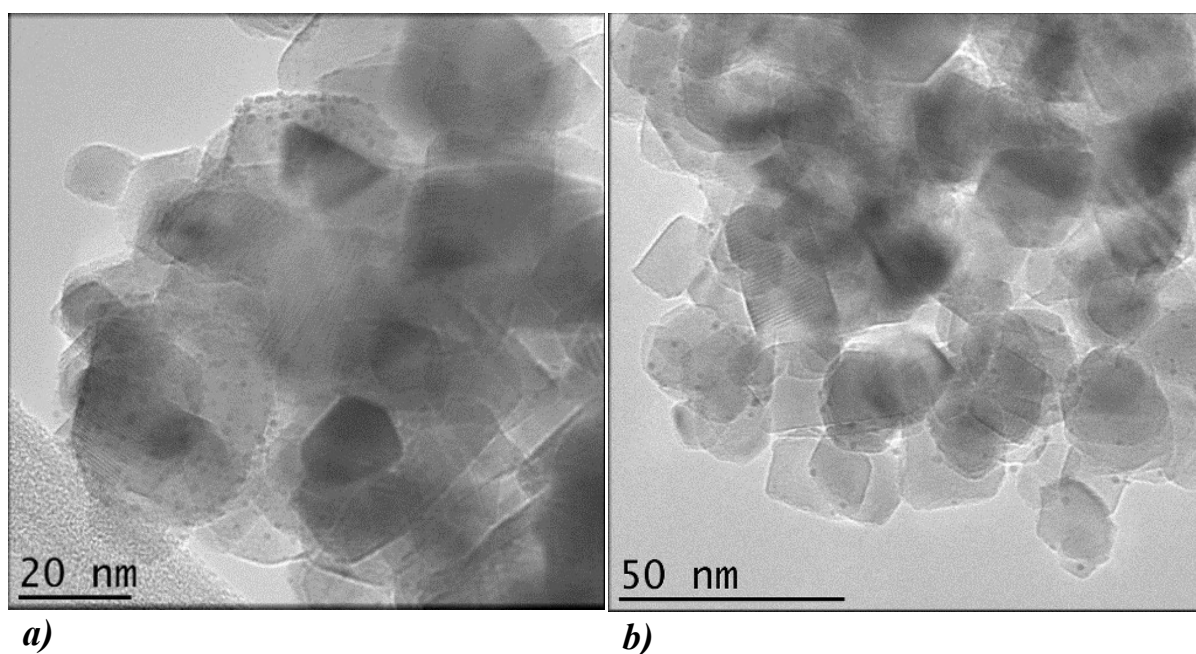

*Figure S8: TEM images of fresh (a) and spent (b) samples of 0.6 wt. % Pt/TiO<sub>2</sub> catalyst. .*

**Table S4:** Comparison of different supported Pt nanoparticulate catalysts for the hydrogenation of FF to 2-FF including the current work.

| Catalyst                                          | Preparation method                           | Catalyst & FF                      | Temp./Press./Solvent/Time        | Conv. (%) | Selec. (%) | Ref |
|---------------------------------------------------|----------------------------------------------|------------------------------------|----------------------------------|-----------|------------|-----|
| 3% Pt/HT                                          | Wetness impregnation                         | FF (0.75 mmols), catalyst (50 mg)  | 30 °C, /15 bar/ water/ 2 h       | 99        | 99         | 1   |
| 3% Pt/SiC-C                                       | Ultrasound promoted impregnation             | FF (0.3 ml), catalyst (20 mg),     | 25 °C/ 10 bar/ water/ 5h         | 99        | 99         | 2   |
| 2.3% Pt/MgO,                                      | Colloidal deposition                         | FF (0.02 mmols) , catalyst (20 mg) | 50 °C/1.03 bar /methanol/ 7 h    | 80        | 99         | 3   |
| 1.4% Pt/CeO <sub>2</sub>                          | Colloidal deposition                         | FF (0.02 mmols) , catalyst (20 mg) | 50 °C/ 1.03 bar /methanol/ 7 h   | 79        | 97         | 3   |
| 1.9% Pt/ $\gamma$ -Al <sub>2</sub> O <sub>3</sub> | Colloidal deposition                         | FF (0.02 mmols) , catalyst (20 mg) | 50 °C/ 1.03 bar /methanol/ 7 h   | 77        | 98         | 3   |
| 5% Pt/TiO <sub>2</sub> nanorod (NR)               | Impregnation-chemical reduction              | FF (26 mmol), catalyst (100 mg)    | 170 °C/20 bar/ water/ 2 h.       | 90        | 2          | 4   |
| 0.7% Pt/TiO <sub>2</sub>                          | One-step flame spray pyrolysis (FSP)         | FF (0.05 ml), catalyst (50 mg)     | 50 °C/ 20 bar/ methanol/ 2 h.    | 83        | 95         | 5   |
| 0.5% Pt/TiO <sub>2</sub>                          | Strong electrostatic adsorption method (SEA) | FF (0.6 mmol), catalyst (50 mg)    | 50 °C/ 20 bar/ methanol/ 2 h.    | 89        | 80         | 6   |
| 1% Pt/SnNb <sub>2</sub> O <sub>6</sub>            | Photoreduction method                        | FF (0.1 mmol), catalyst (8 mg)     | 25 °C/ 1 bar/ methanol/ 2 h.     | 99.9      | 99.9       | 7   |
| 1% Pt/Al <sub>2</sub> O <sub>3</sub>              | Incipient wetness impregnation               | FF (0.3 mmol),                     | 150 °C/ 5 bar/ isopropanol/ 5 h. | 95        | 98         | 8   |

|                          |                      |                                               |                                   |     |    |                 |
|--------------------------|----------------------|-----------------------------------------------|-----------------------------------|-----|----|-----------------|
|                          |                      | catalyst (58 mg)                              |                                   |     |    |                 |
| Pt/CeO <sub>2</sub> /UIO | Deposition method    | FF (0.2 mmol),<br>catalyst (Pt: 0.5 mol<br>%) | 80 °C/ 10 bar/ isopropanol/ 30 h. | 100 | 99 | <sup>9</sup>    |
| 0.6% Pt/TiO <sub>2</sub> | Wetness impregnation | FF (0.3 ml), catalyst<br>(100 mg),            | 30 °C/ 3 bar /isopropanol/ 6 h    | 97  | 95 | Current<br>work |

## Supplementary References

1. G. Gao, J. Remón, Z. Jiang, L. Yao and C. Hu, *Appl. Catal. B: Environ.*, 2022, **309**, 121260.
2. G. Wang, R. Yao, H. Xin, Y. Guan, P. Wu and X. Li, *RSC Advances*, 2018, **8**, 37243-37253.
3. M. J. Taylor, L. J. Durndell, M. A. Isaacs, C. M. A. Parlett, K. Wilson, A. F. Lee and G. Kyriakou, *Appl. Catal. B: Environ.*, 2016, **180**, 580-585.
4. M. Y. Byun, Y. E. Kim, J. H. Baek, J. J. and M. S. Lee, *RSC Adv.*, 2022, **12**, 860-868.
5. W. Tolek, K. Khruetchao, B. Pongthawornsakun, O. Mekasuwandumrong, F. J. C. S. Aires, P. Weerachawanasak and J. Panpranot. *Cat. Commun.*, 2021, **149**, 106246.
6. S. Kuhadomlap, O. Mekasuwandumrong, P. Praserttham, S.-I. Fujita, M. Arai and J. Panpranot, *Catalysts* 2018, **8**, 87.
7. Y. Shi, H. Wang, Z. Wang, C. Liu, M. Shen, T. Wu and L. Wu, *J. Energy Chem.*, 2022, **66**, 566-575.
8. M. Agote-Arán, S. Alijani, C. Coffano, A. Villa and D. Ferri, *Catal. Lett.*, 2021, **152**, 980-990.
9. Y. Long, S. Song, J. Li, L. Wu, Q. Wang, Y. Liu, R. Jin and H. Zhang, *ACS Catal.*, 2018, **8**, 8506-8512.
